# Supplementary material for: Immune cell extracellular vesicles and their mitochondrial content decline with ageing
Source: PubMed Central journal article supplement (PMC6942666; doi:10.1186/s12979-019-0172-9), 2020-01-04
Supplement: 12979_2019_172_MOESM8_ESM.pdf [file 12979_2019_172_MOESM8_ESM.pdf]

**Additional file 8: Table S3.** Antibodies used for flow cytometry.

| Surface Markers | Fluorescence         | Vendor                   | catalogue number |
|-----------------|----------------------|--------------------------|------------------|
| CD81            | BV421                | BD Biosciences           | 740079           |
| CD9             | BV605                | BD Biosciences           | 743048           |
| CD29            | BV650                | BD Biosciences           | 743785           |
| CD63            | PerCP-Cy5.5          | BD Biosciences           | 565426           |
| CD8             | FITC                 | BD Biosciences           | 555634           |
| CD4             | APC-eFluor 780       | ThermoFisher Scientific  | 47-0048-42       |
| CD56            | Brilliant Violet 510 | BD Biosciences           | 563041           |
| CD15            | PE-Cy7               | BD Biosciences           | 560827           |
| CD68            | Brilliant Violet 711 | BD Biosciences           | 565594           |
| CD14 PE         | PE                   | BD Biosciences           | 555398           |
| CD19            | PE-Cy5               | ThermoFisher Scientific  | 15-0199-42       |
| CD235a          | BUV395               | BD Biosciences           | 563810           |
| CD41a           | PE-CY5               | BD Biosciences           | 559768           |
| CD34            | PE-Cy7               | BD Biosciences           | 560710           |
| CD31            | BV711                | BD Biosciences           | 740777           |
| HLA-ABC         | FITC                 | BD Biosciences           | 555552           |
| HLA-G           | PE                   | ThermoFisher Scientific  | MA1-19643        |
| HLA-DRDPDQ      | BUV395               | BD Biosciences           | 740302           |
| IL-1 $\beta$    | PE                   | BD Bioscience            | 340516           |
| IL-6            | PerCP-eFluor 710     | Thermo Fisher Scientific | 46-7069-42       |
| TNF             | FITC                 | BD Bioscience            | 554512           |
| IL-10           | BV650                | BD Bioscience            | 564051           |
| IFN- $\gamma$   | BV711                | BD Bioscience            | 564039           |
| IL-17A          | APC-Cyanine7         | Biologend                | 512320           |
