# Supplementary material for: Immune cell extracellular vesicles and their mitochondrial content decline with ageing
Source: Springer Nature journal article supplement (doi:10.1186/s12979-019-0172-9), 2020-01-04
Supplement: MOESM3 [file 17680408]

**Additional file 3: Table S1A.** Expression levels of surface markers in plasma EVs of HCs. Data are presented as an average value of percentages in each gated EV subsets (n=28). Relatively highly expressed surface markers (highlighted as red) were defined as expression on greater than 5% of gated EV subsets that was statistically significantly higher than at least three other tested markers. Surface markers with a low level of expression (highlighted as green) were defined as percentage expression that was statistically significantly lower than at least three other tested markers.

| LEV        |       | MEV        |      | SEV        |      |
|------------|-------|------------|------|------------|------|
| CD34       | 15.74 | CD34       | 8.75 | CD34       | 7.22 |
| HLA-ABC    | 10.31 | CD14       | 2.52 | CD14       | 2.05 |
| CD81       | 5.85  | HLA-ABC    | 1.52 | CD15       | 0.74 |
| CD14       | 5.75  | CD41a      | 1.11 | CD19       | 0.70 |
| CD31       | 4.76  | CD15       | 0.88 | CD56       | 0.47 |
| CD41a      | 3.75  | CD19       | 0.87 | CD4        | 0.38 |
| CD56       | 3.29  | CD56       | 0.66 | CD68       | 0.33 |
| CD19       | 2.74  | CD4        | 0.60 | HLA-G      | 0.27 |
| HLA-G      | 2.19  | CD81       | 0.45 | CD81       | 0.25 |
| CD8        | 2.16  | CD235a     | 0.42 | CD31       | 0.22 |
| CD29       | 1.97  | CD31       | 0.41 | HLA-ABC    | 0.21 |
| CD9        | 1.42  | CD68       | 0.38 | CD41a      | 0.18 |
| CD4        | 1.26  | HLA-G      | 0.35 | CD29       | 0.07 |
| CD68       | 1.06  | CD29       | 0.15 | CD9        | 0.05 |
| CD15       | 0.97  | CD9        | 0.10 | CD63       | 0.04 |
| HLA-DRDPDQ | 0.72  | HLA-DRDPDQ | 0.06 | CD235a     | 0.03 |
| CD235a     | 0.57  | CD63       | 0.06 | HLA-DRDPDQ | 0.03 |
| CD63       | 0.45  | CD8        | 0.04 | CD8        | 0.02 |

**Table S1B.** P values of comparisons between the tested surface markers in plasma EVs of HCs. Comparisons were performed using a Friedman test with Dunn's multiple comparisons test. "1"=">0.9999999999999999", and "1E-15"="<0.0000000000000001".

Low  High

|                                         | LEV         | MEV         | SEV         |
|-----------------------------------------|-------------|-------------|-------------|
| <b>Friedman test</b>                    |             |             |             |
|                                         | 1E-15       | 1E-15       | 1E-15       |
| <b>Dunn's multiple comparisons test</b> |             |             |             |
| CD81 vs. CD9                            | 2.94407E-05 | 0.002854926 | 7.95621E-05 |
| CD81 vs. CD29                           | 0.000667701 | 1           | 0.635841752 |
| CD81 vs. CD63                           | 1E-15       | 1.48891E-05 | 0.000284022 |
| CD81 vs. CD8                            | 0.092590109 | 1.63314E-06 | 5.20433E-06 |
| CD81 vs. CD4                            | 4.56707E-07 | 1           | 1           |
| CD81 vs. CD56                           | 1           | 1           | 1           |
| CD81 vs. CD15                           | 1.13529E-10 | 1           | 1           |
| CD81 vs. CD68                           | 3.63071E-07 | 1           | 1           |
| CD81 vs. CD14                           | 1           | 0.024021002 | 0.0526752   |
| CD81 vs. CD19                           | 0.635841752 | 1           | 1           |
| CD81 vs. CD235a                         | 2.135E-12   | 1           | 2.24548E-05 |
| CD81 vs. CD41                           | 0.0526752   | 1           | 1           |
| CD81 vs. CD34                           | 1           | 0.000183196 | 0.001280142 |

|                     |             |             |             |
|---------------------|-------------|-------------|-------------|
| CD81 vs. CD31       | 1           | 1           | 1           |
| CD81 vs. HLA-ABC    | 1           | 1           | 1           |
| CD81 vs. HLA-G      | 0.00113881  | 0.060773221 | 0.002151082 |
| CD81 vs. HLA-DRDPDQ | 9.097E-12   | 3.14947E-06 | 1.48891E-05 |
| CD9 vs. CD29        | 1           | 1           | 1           |
| CD9 vs. CD63        | 0.139389407 | 1           | 1           |
| CD9 vs. CD8         | 1           | 1           | 1           |
| CD9 vs. CD4         | 1           | 0.461286533 | 0.001811806 |
| CD9 vs. CD56        | 0.408002314 | 5.08578E-08 | 1.2097E-11  |
| CD9 vs. CD15        | 1           | 1           | 1           |
| CD9 vs. CD68        | 1           | 0.001073865 | 2.65716E-08 |
| CD9 vs. CD14        | 1.29676E-05 | 1.09E-13    | 1E-15       |
| CD9 vs. CD19        | 1           | 3.36801E-05 | 4.32784E-08 |
| CD9 vs. CD235a      | 1           | 1           | 1           |
| CD9 vs. CD41        | 1           | 0.000235576 | 0.587330598 |
| CD9 vs. CD34        | 5.96E-11    | 1.00E-15    | 1E-15       |
| CD9 vs. CD31        | 0.006182416 | 0.007267858 | 0.000195128 |
| CD9 vs. HLA-ABC     | 2.03559E-06 | 9.01558E-07 | 0.029335381 |
| CD9 vs. HLA-G       | 1           | 1           | 1           |
| CD9 vs. HLA-DRDPDQ  | 1           | 1           | 1           |
| CD29 vs. CD63       | 0.013001287 | 1           | 1           |
| CD29 vs. CD8        | 1           | 0.408002314 | 1           |
| CD29 vs. CD4        | 1           | 1           | 1           |
| CD29 vs. CD56       | 1           | 0.000363688 | 1.59505E-05 |
| CD29 vs. CD15       | 1           | 1           | 1           |
| CD29 vs. CD68       | 1           | 0.520847431 | 0.003570852 |
| CD29 vs. CD14       | 0.000321493 | 1.26515E-08 | 1.76214E-08 |
| CD29 vs. CD19       | 1           | 0.045595462 | 0.004972608 |
| CD29 vs. CD235a     | 0.292228944 | 1           | 1           |
| CD29 vs. CD41       | 1           | 0.181885956 | 1           |
| CD29 vs. CD34       | 4.61371E-09 | 5.632E-12   | 3.7473E-11  |
| CD29 vs. CD31       | 0.073387369 | 1           | 1           |
| CD29 vs. HLA-ABC    | 6.12379E-05 | 0.003193843 | 1           |
| CD29 vs. HLA-G      | 1           | 1           | 1           |
| CD29 vs. HLA-DRDPDQ | 0.542205928 | 0.587330598 | 1           |
| CD63 vs. CD8        | 5.36762E-05 | 1           | 1           |
| CD63 vs. CD4        | 1           | 0.008998326 | 0.005546273 |
| CD63 vs. CD56       | 3.99143E-08 | 3.4138E-11  | 7.8648E-11  |
| CD63 vs. CD15       | 1           | 0.868360119 | 1           |
| CD63 vs. CD68       | 1           | 4.51205E-06 | 1.32216E-07 |
| CD63 vs. CD14       | 1.00E-15    | 1.00E-15    | 5E-15       |
| CD63 vs. CD19       | 2.3558E-06  | 7.0102E-08  | 2.11427E-07 |
| CD63 vs. CD235a     | 1           | 0.092590109 | 1           |
| CD63 vs. CD41       | 0.00011729  | 7.19679E-07 | 1           |
| CD63 vs. CD34       | 1E-15       | 1E-15       | 1E-15       |
| CD63 vs. CD31       | 1.7673E-11  | 4.70197E-05 | 0.000667701 |
| CD63 vs. HLA-ABC    | 1E-15       | 9.74782E-10 | 0.076902096 |
| CD63 vs. HLA-G      | 0.008089355 | 1           | 1           |
| CD63 vs. HLA-DRDPDQ | 1           | 1           | 1           |

|                     |             |             |             |
|---------------------|-------------|-------------|-------------|
| CD8 vs. CD4         | 1           | 0.001614687 | 0.000161404 |
| CD8 vs. CD56        | 1           | 1.758E-12   | 2.38E-13    |
| CD8 vs. CD15        | 0.027911834 | 0.246451629 | 0.268444462 |
| CD8 vs. CD68        | 1           | 4.56707E-07 | 8.92832E-10 |
| CD8 vs. CD14        | 0.0526752   | 1.00E-15    | 1.00E-15    |
| CD8 vs. CD19        | 1           | 5.46677E-09 | 1.50874E-09 |
| CD8 vs. CD235a      | 0.00301986  | 0.020644898 | 1           |
| CD8 vs. CD41        | 1           | 6.47123E-08 | 0.106258069 |
| CD8 vs. CD34        | 6.43955E-06 | 1.00E-15    | 1.00E-15    |
| CD8 vs. CD31        | 1           | 5.58806E-06 | 1.38962E-05 |
| CD8 vs. HLA-ABC     | 0.014423391 | 5.9626E-11  | 0.003570852 |
| CD8 vs. HLA-G       | 1           | 1           | 1           |
| CD8 vs. HLA-DRDPDQ  | 0.0068874   | 1           | 1           |
| CD4 vs. CD56        | 0.029335381 | 0.139389407 | 0.304833323 |
| CD4 vs. CD15        | 1           | 1           | 1           |
| CD4 vs. CD68        | 1           | 1           | 1           |
| CD4 vs. CD14        | 1.80912E-07 | 5.36762E-05 | 0.003774881 |
| CD4 vs. CD19        | 0.33155122  | 1           | 1           |
| CD4 vs. CD235a      | 1           | 1           | 0.000592019 |
| CD4 vs. CD41        | 1           | 1           | 1           |
| CD4 vs. CD34        | 2.09E-13    | 1.0434E-07  | 5.36762E-05 |
| CD4 vs. CD31        | 0.000207805 | 1           | 1           |
| CD4 vs. HLA-ABC     | 2.25562E-08 | 0.661436018 | 1           |
| CD4 vs. HLA-G       | 1           | 1           | 0.032389554 |
| CD4 vs. HLA-DRDPDQ  | 1           | 0.002698595 | 0.000411173 |
| CD56 vs. CD15       | 0.000103119 | 0.000752604 | 0.000195128 |
| CD56 vs. CD68       | 0.025257368 | 1           | 1           |
| CD56 vs. CD14       | 1           | 1           | 1           |
| CD56 vs. CD19       | 1           | 1           | 1           |
| CD56 vs. CD235a     | 5.99917E-06 | 0.014423391 | 1.933E-12   |
| CD56 vs. CD41       | 1           | 1           | 0.000708936 |
| CD56 vs. CD34       | 0.003193843 | 0.661436018 | 1           |
| CD56 vs. CD31       | 1           | 1           | 1           |
| CD56 vs. HLA-ABC    | 1           | 1           | 0.027911834 |
| CD56 vs. HLA-G      | 1           | 4.51205E-06 | 1.64572E-09 |
| CD56 vs. HLA-DRDPDQ | 1.70849E-05 | 4.211E-12   | 1.061E-12   |
| CD15 vs. CD68       | 1           | 0.835604463 | 0.026553422 |
| CD15 vs. CD14       | 3.7473E-11  | 3.39347E-08 | 3.63071E-07 |
| CD15 vs. CD19       | 0.002550441 | 0.080573256 | 0.035740478 |
| CD15 vs. CD235a     | 1           | 1           | 0.635841752 |
| CD15 vs. CD41       | 0.050208314 | 0.304833323 | 1           |
| CD15 vs. CD34       | 1E-15       | 1.7673E-11  | 1.16143E-09 |
| CD15 vs. CD31       | 1.9559E-07  | 1           | 1           |
| CD15 vs. HLA-ABC    | 3.153E-12   | 0.006182416 | 1           |
| CD15 vs. HLA-G      | 1           | 1           | 1           |
| CD15 vs. HLA-DRDPDQ | 1           | 0.360400471 | 0.500257628 |
| CD68 vs. CD14       | 1.43031E-07 | 0.055255112 | 1           |
| CD68 vs. CD19       | 0.292228944 | 1           | 1           |
| CD68 vs. CD235a     | 1           | 1           | 5.46677E-09 |

|                        |             |             |             |
|------------------------|-------------|-------------|-------------|
| CD68 vs. CD41          | 1           | 1           | 0.073387369 |
| CD68 vs. CD34          | 1.64E-13    | 0.000524599 | 0.304833323 |
| CD68 vs. CD31          | 0.000171968 | 1           | 1           |
| CD68 vs. HLA-ABC       | 1.76214E-08 | 1           | 1           |
| CD68 vs. HLA-G         | 1           | 0.026553422 | 1.75784E-06 |
| CD68 vs. HLA-DRDPDQ    | 1           | 9.01558E-07 | 3.28008E-09 |
| CD14 vs. CD19          | 0.391531589 | 0.611149293 | 1           |
| CD14 vs. CD235a        | 6.48E-13    | 2.03559E-06 | 1.00E-15    |
| CD14 vs. CD41          | 0.029335381 | 0.174059211 | 1.75784E-06 |
| CD14 vs. CD34          | 1           | 1           | 1           |
| CD14 vs. CD31          | 1           | 0.010003455 | 0.026553422 |
| CD14 vs. HLA-ABC       | 1           | 1           | 0.000171968 |
| CD14 vs. HLA-G         | 0.000557332 | 3.7473E-11  | 3.48E-13    |
| CD14 vs. HLA-DRDPDQ    | 2.85E-12    | 1.00E-15    | 1E-15       |
| CD19 vs. CD235a        | 0.000207805 | 0.773418081 | 9.06103E-09 |
| CD19 vs. CD41          | 1           | 1           | 0.096952955 |
| CD19 vs. CD34          | 0.000133328 | 0.011712409 | 0.236088598 |
| CD19 vs. CD31          | 1           | 1           | 1           |
| CD19 vs. HLA-ABC       | 0.127407827 | 1           | 1           |
| CD19 vs. HLA-G         | 1           | 0.00135695  | 2.72471E-06 |
| CD19 vs. HLA-DRDPDQ    | 0.000524599 | 1.16413E-08 | 5.46677E-09 |
| CD235a vs. CD41        | 0.00585615  | 1           | 0.268444462 |
| CD235a vs. CD34        | 1E-15       | 2.13393E-09 | 1E-15       |
| CD235a vs. CD31        | 6.47362E-09 | 1           | 5.73369E-05 |
| CD235a vs. HLA-ABC     | 4E-14       | 0.088410552 | 0.01111422  |
| CD235a vs. HLA-G       | 0.198523705 | 1           | 1           |
| CD235a vs. HLA-DRDPDQ  | 1           | 0.032389554 | 1           |
| CD41 vs. CD34          | 2.72471E-06 | 0.002277063 | 7.04294E-09 |
| CD41 vs. CD31          | 1           | 1           | 1           |
| CD41 vs. HLA-ABC       | 0.007668186 | 1           | 1           |
| CD41 vs. HLA-G         | 1           | 0.007267858 | 1           |
| CD41 vs. HLA-DRDPDQ    | 0.013001287 | 1.32216E-07 | 0.207359276 |
| CD34 vs. CD31          | 0.246451629 | 6.12379E-05 | 0.000557332 |
| CD34 vs. HLA-ABC       | 1           | 0.139389407 | 1.40901E-06 |
| CD34 vs. HLA-G         | 9.85188E-09 | 3.00E-15    | 1E-15       |
| CD34 vs. HLA-DRDPDQ    | 1E-15       | 1E-15       | 1E-15       |
| CD31 vs. HLA-ABC       | 1           | 1           | 1           |
| CD31 vs. HLA-G         | 0.111215772 | 0.133273829 | 0.004707368 |
| CD31 vs. HLA-DRDPDQ    | 2.25562E-08 | 1.05282E-05 | 3.85065E-05 |
| HLA-ABC vs. HLA-G      | 0.000109985 | 5.73369E-05 | 0.345700224 |
| HLA-ABC vs. HLA-DRDPDQ | 2.09E-13    | 1.36262E-10 | 0.008089355 |
| HLA-G vs. HLA-DRDPDQ   | 0.375671045 | 1           | 1           |
