# Supplementary material for: Immune cell extracellular vesicles and their mitochondrial content decline with ageing
Source: Springer Nature journal article supplement (doi:10.1186/s12979-019-0172-9), 2020-01-04

**Additional file 4: Figure S3.** Plasma EVs carry cytokines. Separated EVs from 12 HCs were fixed, permeabilized and stained with fluorescence-conjugated antibodies against the indicated cytokines. **a.** The percentage of EVs expressing each cytokine was determined by high resolution multicolor flow cytometry. Representative dot plots present results of all tested cytokines in total plasma from one HC. **b.** EVs expressing each cytokine were gated and plotted to a FSC-H vs. SSC-A plot. Representative density dot plots present the distribution of gated cytokine expressing EVs in the various EV subsets. (FSC-H: Forward Scatter-Height; SSC: Side Scatter-Area.)

Supplementary Figure 3

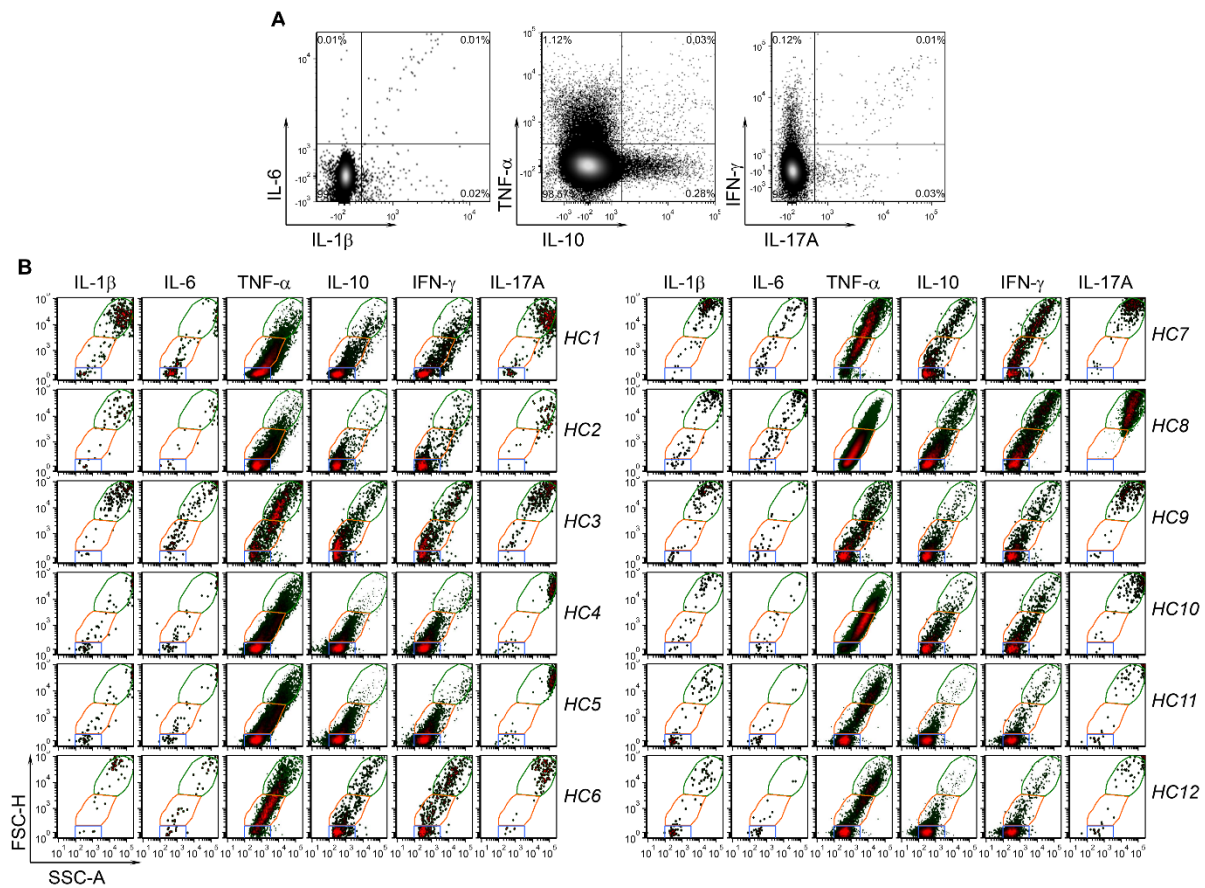

Supplement: MOESM4 [file 17680408]
