# Supplementary material for: Immune cell extracellular vesicles and their mitochondrial content decline with ageing
Source: Springer Nature journal article supplement (doi:10.1186/s12979-019-0172-9), 2020-01-04

**Additional file 5: Figure S4.** The percentage of CD61<sup>+</sup>CD41a<sup>+</sup> vesicles was low in the separated plasma EVs. Separated EVs were stained with fluorescence-conjugated antibodies against the indicated surface markers. The percentages of EVs expressing each tested molecule were determined by high resolution multicolor flow cytometry. The graphs present summary percentages of CD61<sup>+</sup>CD41a<sup>+</sup>, CD61<sup>+</sup>CD41a<sup>-</sup> and CD61<sup>-</sup>CD41a<sup>+</sup> vesicles in plasma EV subsets from HCs (n=28).

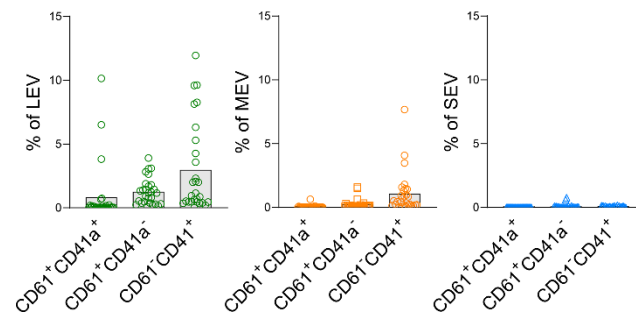

Supplement: MOESM5 [file 17680408]
