# Supplementary material for: Immune cell extracellular vesicles and their mitochondrial content decline with ageing
Source: Springer Nature journal article supplement (doi:10.1186/s12979-019-0172-9), 2020-01-04
Supplement: MOESM6 [file 17680408]

# Additional file 6: Figure S5. Univariable regressions between age and the expression levels of surface Dev markers in the subsets of plasma EVs of HCs.

SEV

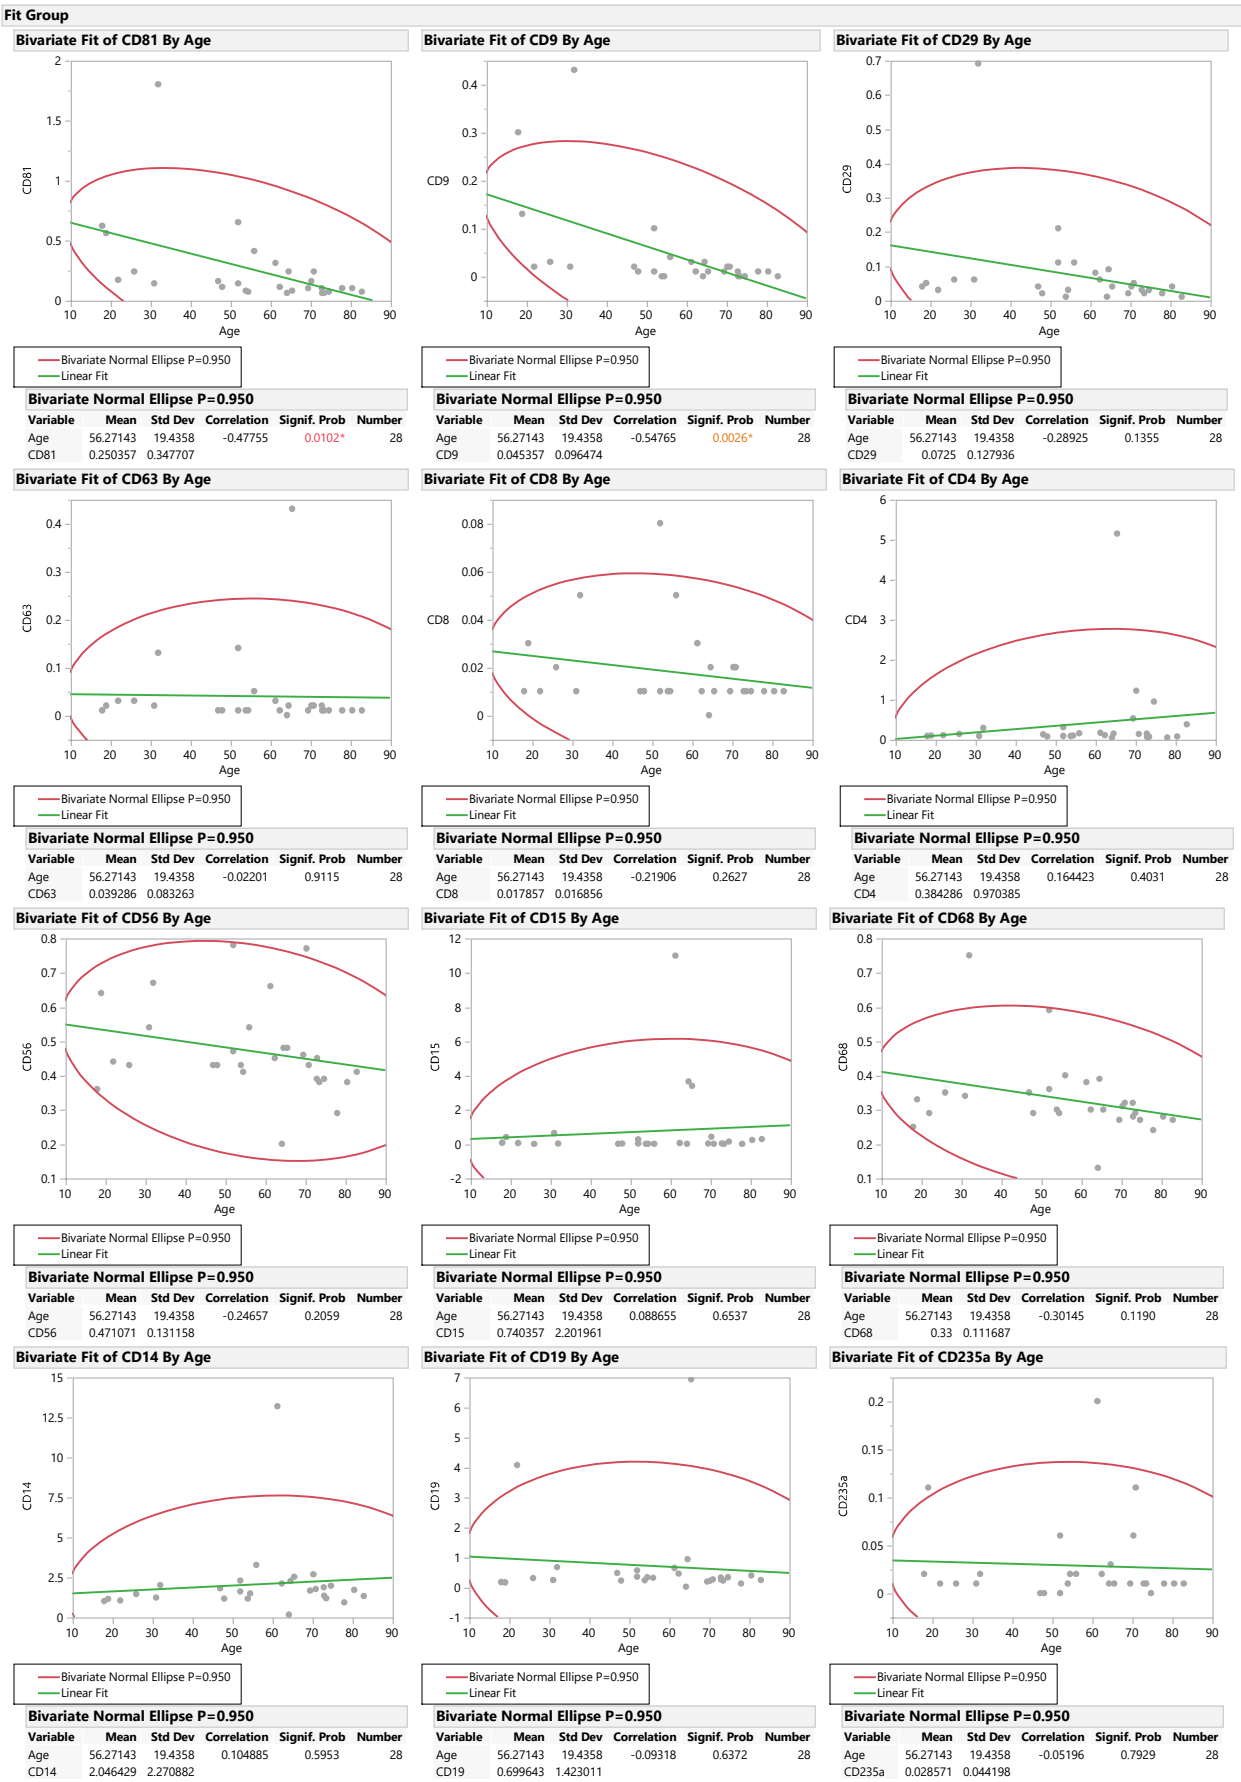

Bivariate Fit of CD41a By Age

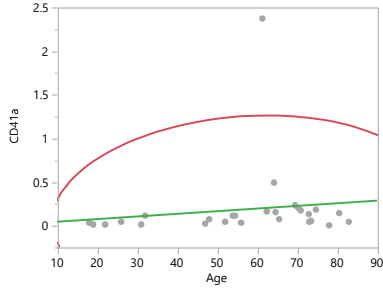

— Bivariate Normal Ellipse P=0.950  
— Linear Fit

Bivariate Normal Ellipse P=0.950

| Variable | Mean     | Std Dev  | Correlation | Signif. Prob | Number |
|----------|----------|----------|-------------|--------------|--------|
| Age      | 56.27143 | 19.4358  | 0.133667    | 0.4977       | 28     |
| CD41a    | 0.180357 | 0.440711 |             |              |        |

Bivariate Fit of CD34 By Age

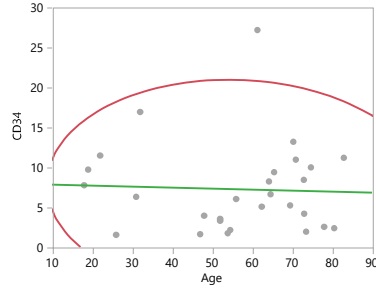

— Bivariate Normal Ellipse P=0.950  
— Linear Fit

Bivariate Normal Ellipse P=0.950

| Variable | Mean     | Std Dev  | Correlation | Signif. Prob | Number |
|----------|----------|----------|-------------|--------------|--------|
| Age      | 56.27143 | 19.4358  | -0.04317    | 0.8273       | 28     |
| CD34     | 7.221429 | 5.599063 |             |              |        |

Bivariate Fit of CD31 By Age

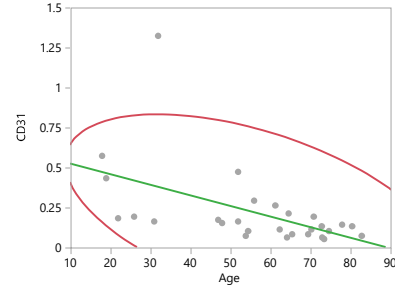

— Bivariate Normal Ellipse P=0.950  
— Linear Fit

Bivariate Normal Ellipse P=0.950

| Variable | Mean     | Std Dev  | Correlation | Signif. Prob | Number |
|----------|----------|----------|-------------|--------------|--------|
| Age      | 56.27143 | 19.4358  | -0.51232    | 0.0053*      | 28     |
| CD31     | 0.215714 | 0.251152 |             |              |        |

Bivariate Fit of HLA-ABC By Age

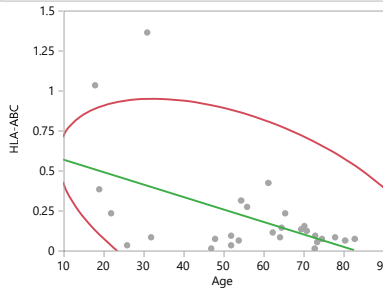

— Bivariate Normal Ellipse P=0.950  
— Linear Fit

Bivariate Normal Ellipse P=0.950

| Variable | Mean     | Std Dev  | Correlation | Signif. Prob | Number |
|----------|----------|----------|-------------|--------------|--------|
| Age      | 56.27143 | 19.4358  | -0.50082    | 0.0066*      | 28     |
| HLA-ABC  | 0.205714 | 0.302366 |             |              |        |

Bivariate Fit of HLA-G By Age

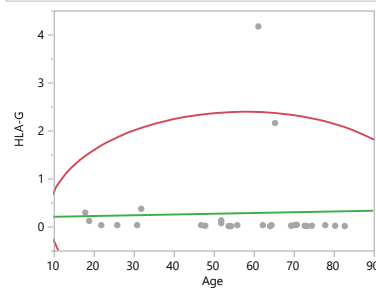

— Bivariate Normal Ellipse P=0.950  
— Linear Fit

Bivariate Normal Ellipse P=0.950

| Variable | Mean     | Std Dev  | Correlation | Signif. Prob | Number |
|----------|----------|----------|-------------|--------------|--------|
| Age      | 56.27143 | 19.4358  | 0.036466    | 0.8538       | 28     |
| HLA-G    | 0.267857 | 0.864147 |             |              |        |

Bivariate Fit of HLA-DRDPDQ By Age

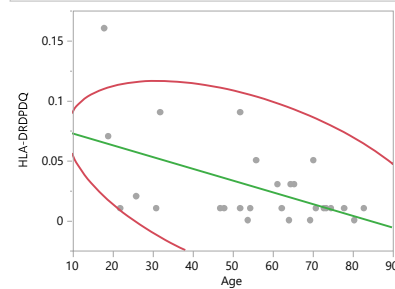

— Bivariate Normal Ellipse P=0.950  
— Linear Fit

Bivariate Normal Ellipse P=0.950

| Variable   | Mean     | Std Dev  | Correlation | Signif. Prob | Number |
|------------|----------|----------|-------------|--------------|--------|
| Age        | 56.27143 | 19.4358  | -0.52455    | 0.0042*      | 28     |
| HLA-DRDPDQ | 0.027143 | 0.036297 |             |              |        |

MEV Fit Group

Bivariate Fit of CD81 By Age

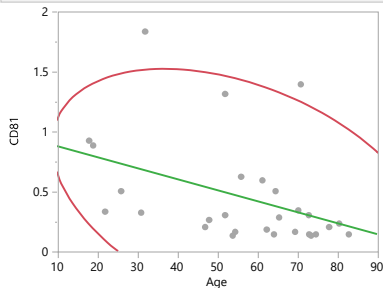

— Bivariate Normal Ellipse P=0.950  
— Linear Fit

Bivariate Normal Ellipse P=0.950

| Variable | Mean     | Std Dev  | Correlation | Signif. Prob | Number |
|----------|----------|----------|-------------|--------------|--------|
| Age      | 56.27143 | 19.4358  | -0.40888    | 0.0307*      | 28     |
| CD81     | 0.450714 | 0.436484 |             |              |        |

Bivariate Fit of CD9 By Age

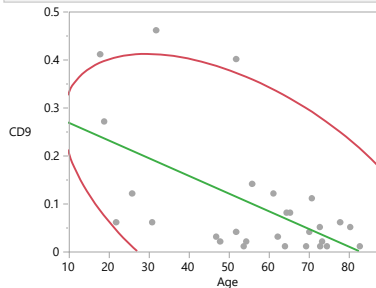

— Bivariate Normal Ellipse P=0.950  
— Linear Fit

Bivariate Normal Ellipse P=0.950

| Variable | Mean     | Std Dev  | Correlation | Signif. Prob | Number |
|----------|----------|----------|-------------|--------------|--------|
| Age      | 56.27143 | 19.4358  | -0.56072    | 0.0019*      | 28     |
| CD9      | 0.0975   | 0.127994 |             |              |        |

Bivariate Fit of CD29 By Age

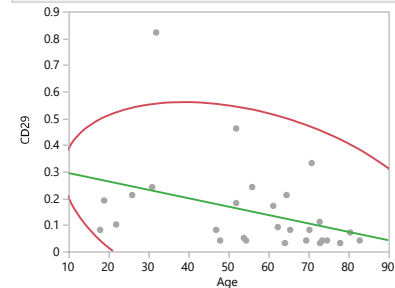

— Bivariate Normal Ellipse P=0.950  
— Linear Fit

Bivariate Normal Ellipse P=0.950

| Variable | Mean     | Std Dev  | Correlation | Signif. Prob | Number |
|----------|----------|----------|-------------|--------------|--------|
| Age      | 56.27143 | 19.4358  | -0.36474    | 0.0563       | 28     |
| CD29     | 0.147143 | 0.168102 |             |              |        |

Bivariate Fit of CD63 By Age

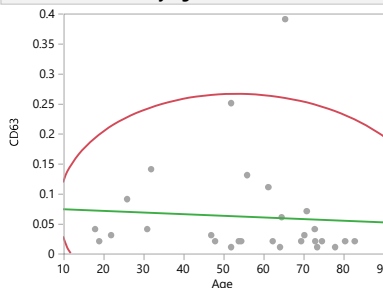

— Bivariate Normal Ellipse P=0.950  
— Linear Fit

Bivariate Normal Ellipse P=0.950

| Variable | Mean     | Std Dev | Correlation | Signif. Prob | Number |
|----------|----------|---------|-------------|--------------|--------|
| Age      | 56.27143 | 19.4358 | -0.06301    | 0.7501       | 28     |
| CD63     | 0.060357 | 0.08382 |             |              |        |

Bivariate Fit of CD8 By Age

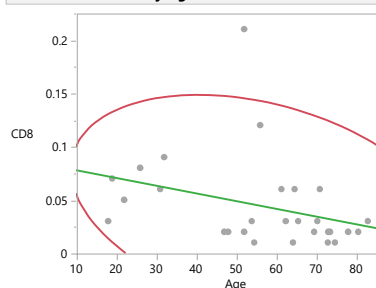

— Bivariate Normal Ellipse P=0.950  
— Linear Fit

Bivariate Normal Ellipse P=0.950

| Variable | Mean     | Std Dev  | Correlation | Signif. Prob | Number |
|----------|----------|----------|-------------|--------------|--------|
| Age      | 56.27143 | 19.4358  | -0.3312     | 0.0851       | 28     |
| CD8      | 0.044286 | 0.042551 |             |              |        |

Bivariate Fit of CD4 By Age

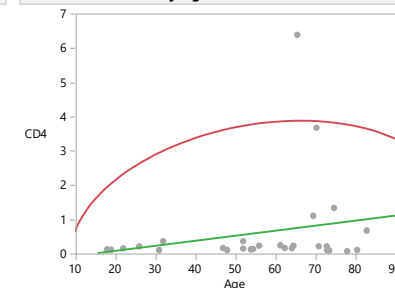

— Bivariate Normal Ellipse P=0.950  
— Linear Fit

Bivariate Normal Ellipse P=0.950

| Variable | Mean     | Std Dev  | Correlation | Signif. Prob | Number |
|----------|----------|----------|-------------|--------------|--------|
| Age      | 56.27143 | 19.4358  | 0.213974    | 0.2742       | 28     |
| CD4      | 0.597143 | 1.334183 |             |              |        |

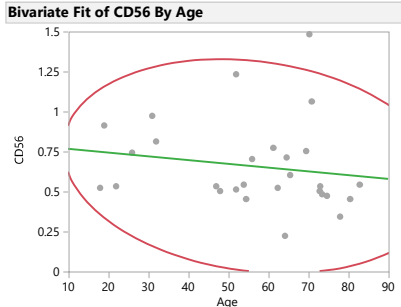

**Bivariate Normal Ellipse P=0.950**

| Variable | Mean     | Std Dev  | Correlation | Signif. Prob | Number |
|----------|----------|----------|-------------|--------------|--------|
| Age      | 56.27143 | 19.4358  | -0.16788    | 0.3932       | 28     |
| CD56     | 0.655714 | 0.273339 |             |              |        |

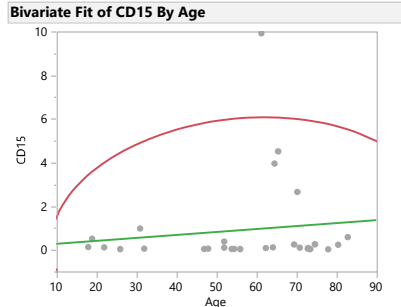

**Bivariate Normal Ellipse P=0.950**

| Variable | Mean     | Std Dev  | Correlation | Signif. Prob | Number |
|----------|----------|----------|-------------|--------------|--------|
| Age      | 56.27143 | 19.4358  | 0.12599     | 0.5229       | 28     |
| CD15     | 0.882143 | 2.112703 |             |              |        |

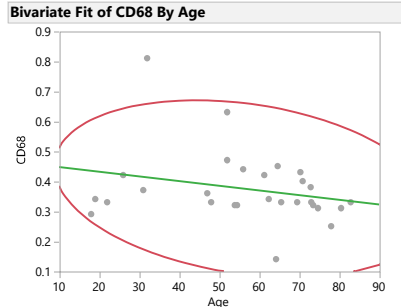

**Bivariate Normal Ellipse P=0.950**

| Variable | Mean     | Std Dev  | Correlation | Signif. Prob | Number |
|----------|----------|----------|-------------|--------------|--------|
| Age      | 56.27143 | 19.4358  | -0.25124    | 0.1972       | 28     |
| CD68     | 0.375    | 0.120385 |             |              |        |

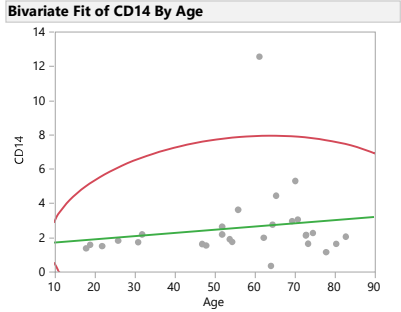

**Bivariate Normal Ellipse P=0.950**

| Variable | Mean     | Std Dev  | Correlation | Signif. Prob | Number |
|----------|----------|----------|-------------|--------------|--------|
| Age      | 56.27143 | 19.4358  | 0.164496    | 0.4029       | 28     |
| CD14     | 2.524286 | 2.195069 |             |              |        |

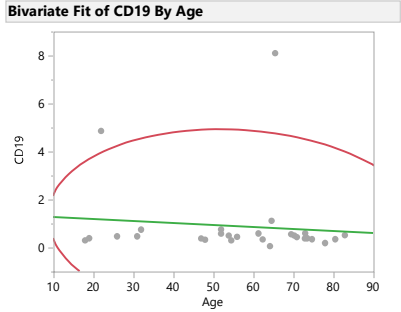

**Bivariate Normal Ellipse P=0.950**

| Variable | Mean     | Std Dev | Correlation | Signif. Prob | Number |
|----------|----------|---------|-------------|--------------|--------|
| Age      | 56.27143 | 19.4358 | -0.09731    | 0.6223       | 28     |
| CD19     | 0.873929 | 1.64989 |             |              |        |

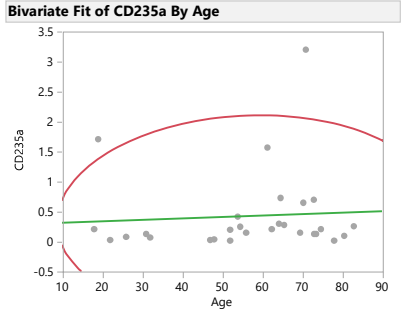

**Bivariate Normal Ellipse P=0.950**

| Variable | Mean     | Std Dev  | Correlation | Signif. Prob | Number |
|----------|----------|----------|-------------|--------------|--------|
| Age      | 56.27143 | 19.4358  | 0.068334    | 0.7297       | 28     |
| CD235a   | 0.417857 | 0.686296 |             |              |        |

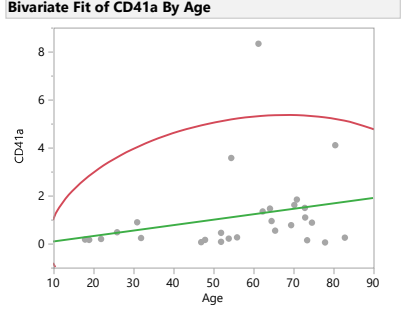

**Bivariate Normal Ellipse P=0.950**

| Variable | Mean     | Std Dev  | Correlation | Signif. Prob | Number |
|----------|----------|----------|-------------|--------------|--------|
| Age      | 56.27143 | 19.4358  | 0.254364    | 0.1915       | 28     |
| CD41a    | 1.112857 | 1.726038 |             |              |        |

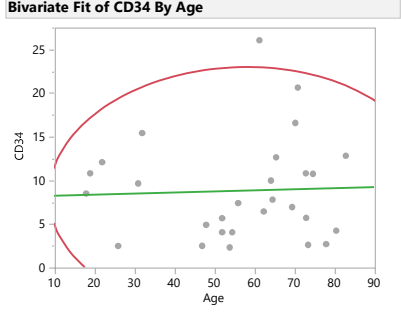

**Bivariate Normal Ellipse P=0.950**

| Variable | Mean     | Std Dev  | Correlation | Signif. Prob | Number |
|----------|----------|----------|-------------|--------------|--------|
| Age      | 56.27143 | 19.4358  | 0.040541    | 0.8377       | 28     |
| CD34     | 8.745714 | 5.797205 |             |              |        |

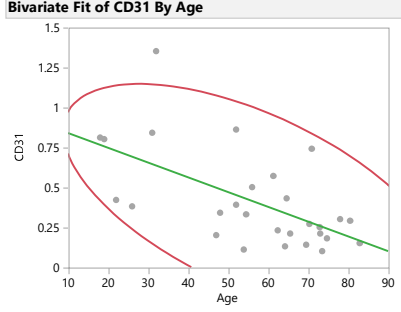

**Bivariate Normal Ellipse P=0.950**

| Variable | Mean     | Std Dev | Correlation | Signif. Prob | Number |
|----------|----------|---------|-------------|--------------|--------|
| Age      | 56.27143 | 19.4358 | -0.59872    | 0.0008*      | 28     |
| CD31     | 0.411786 | 0.29968 |             |              |        |

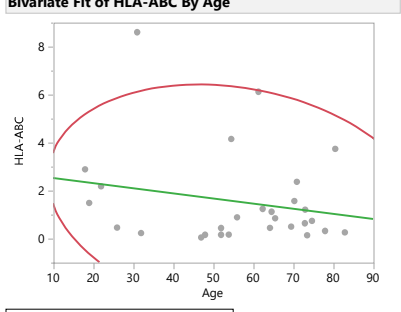

**Bivariate Normal Ellipse P=0.950**

| Variable | Mean     | Std Dev  | Correlation | Signif. Prob | Number |
|----------|----------|----------|-------------|--------------|--------|
| Age      | 56.27143 | 19.4358  | -0.20649    | 0.2918       | 28     |
| HLA-ABC  | 1.520714 | 1.995135 |             |              |        |

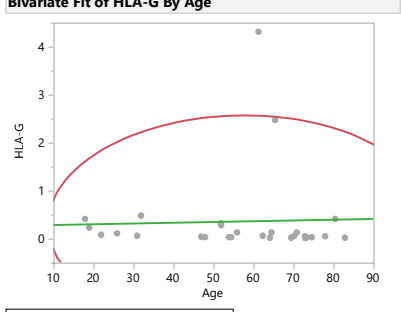

**Bivariate Normal Ellipse P=0.950**

| Variable | Mean     | Std Dev  | Correlation | Signif. Prob | Number |
|----------|----------|----------|-------------|--------------|--------|
| Age      | 56.27143 | 19.4358  | 0.033505    | 0.8656       | 28     |
| HLA-G    | 0.348214 | 0.902195 |             |              |        |

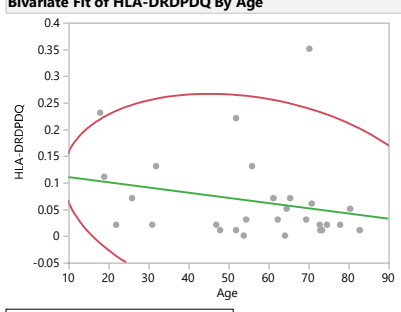

**Bivariate Normal Ellipse P=0.950**

| Variable   | Mean     | Std Dev  | Correlation | Signif. Prob | Number |
|------------|----------|----------|-------------|--------------|--------|
| Age        | 56.27143 | 19.4358  | -0.23086    | 0.2372       | 28     |
| HLA-DRDPDQ | 0.064286 | 0.082302 |             |              |        |

Where:(Size == "6000")

Fit Group

Bivariate Fit of CD81 By Age

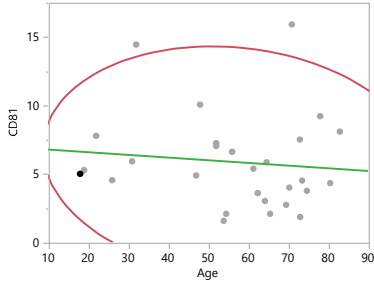

— Bivariate Normal Ellipse P=0.950  
— Linear Fit

Bivariate Normal Ellipse P=0.950

| Variable | Mean     | Std Dev  | Correlation | Signif. Prob | Number |
|----------|----------|----------|-------------|--------------|--------|
| Age      | 56.27143 | 19.4358  | -0.11118    | 0.5733       | 28     |
| CD81     | 5.845    | 3.440691 |             |              |        |

Bivariate Fit of CD9 By Age

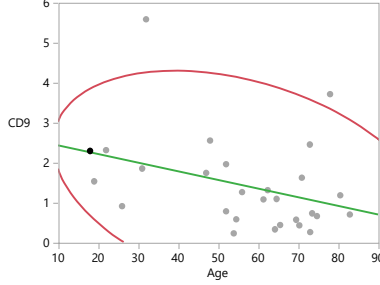

— Bivariate Normal Ellipse P=0.950  
— Linear Fit

Bivariate Normal Ellipse P=0.950

| Variable | Mean     | Std Dev | Correlation | Signif. Prob | Number |
|----------|----------|---------|-------------|--------------|--------|
| Age      | 56.27143 | 19.4358 | -0.35882    | 0.0608       | 28     |
| CD9      | 1.423214 | 1.16972 |             |              |        |

Bivariate Fit of CD29 By Age

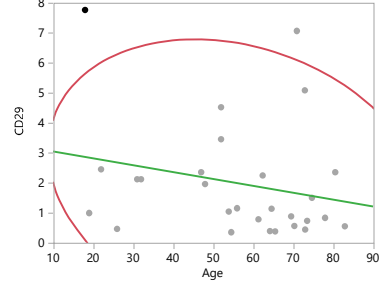

— Bivariate Normal Ellipse P=0.950  
— Linear Fit

Bivariate Normal Ellipse P=0.950

| Variable | Mean     | Std Dev  | Correlation | Signif. Prob | Number |
|----------|----------|----------|-------------|--------------|--------|
| Age      | 56.27143 | 19.4358  | -0.22782    | 0.2436       | 28     |
| CD29     | 1.966429 | 1.958522 |             |              |        |

Bivariate Fit of CD63 By Age

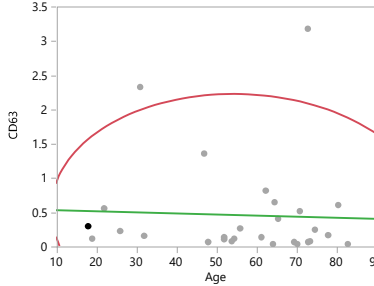

— Bivariate Normal Ellipse P=0.950  
— Linear Fit

Bivariate Normal Ellipse P=0.950

| Variable | Mean     | Std Dev | Correlation | Signif. Prob | Number |
|----------|----------|---------|-------------|--------------|--------|
| Age      | 56.27143 | 19.4358 | -0.04142    | 0.8342       | 28     |
| CD63     | 0.452143 | 0.72201 |             |              |        |

Bivariate Fit of CD8 By Age

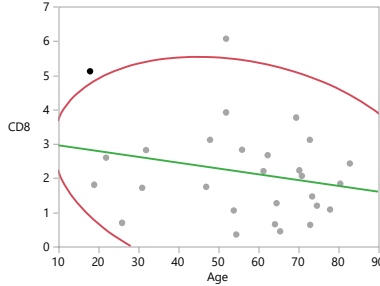

— Bivariate Normal Ellipse P=0.950  
— Linear Fit

Bivariate Normal Ellipse P=0.950

| Variable | Mean     | Std Dev  | Correlation | Signif. Prob | Number |
|----------|----------|----------|-------------|--------------|--------|
| Age      | 56.27143 | 19.4358  | -0.23902    | 0.2206       | 28     |
| CD8      | 2.158571 | 1.374193 |             |              |        |

Bivariate Fit of CD4 By Age

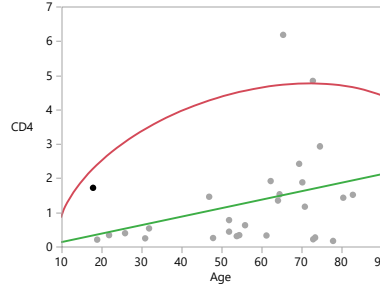

— Bivariate Normal Ellipse P=0.950  
— Linear Fit

Bivariate Normal Ellipse P=0.950

| Variable | Mean     | Std Dev  | Correlation | Signif. Prob | Number |
|----------|----------|----------|-------------|--------------|--------|
| Age      | 56.27143 | 19.4358  | 0.336811    | 0.0797       | 28     |
| CD4      | 1.26     | 1.424568 |             |              |        |

Bivariate Fit of CD56 By Age

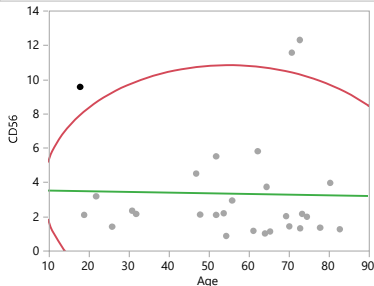

— Bivariate Normal Ellipse P=0.950  
— Linear Fit

Bivariate Normal Ellipse P=0.950

| Variable | Mean     | Std Dev | Correlation | Signif. Prob | Number |
|----------|----------|---------|-------------|--------------|--------|
| Age      | 56.27143 | 19.4358 | -0.02485    | 0.9001       | 28     |
| CD56     | 3.286071 | 3.06521 |             |              |        |

Bivariate Fit of CD15 By Age

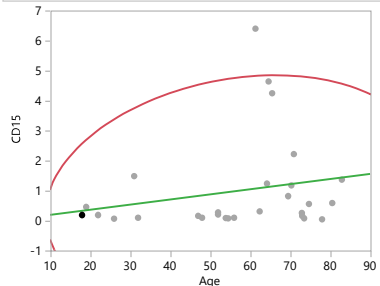

— Bivariate Normal Ellipse P=0.950  
— Linear Fit

Bivariate Normal Ellipse P=0.950

| Variable | Mean     | Std Dev  | Correlation | Signif. Prob | Number |
|----------|----------|----------|-------------|--------------|--------|
| Age      | 56.27143 | 19.4358  | 0.210514    | 0.2823       | 28     |
| CD15     | 0.9675   | 1.577818 |             |              |        |

Bivariate Fit of CD68 By Age

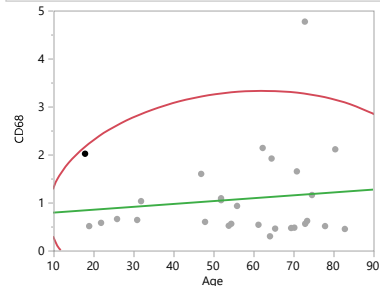

— Bivariate Normal Ellipse P=0.950  
— Linear Fit

Bivariate Normal Ellipse P=0.950

| Variable | Mean     | Std Dev  | Correlation | Signif. Prob | Number |
|----------|----------|----------|-------------|--------------|--------|
| Age      | 56.27143 | 19.4358  | 0.127415    | 0.5182       | 28     |
| CD68     | 1.058929 | 0.922831 |             |              |        |

Bivariate Fit of CD14 By Age

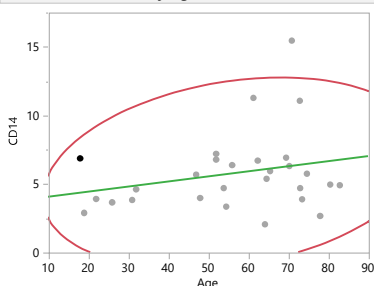

— Bivariate Normal Ellipse P=0.950  
— Linear Fit

Bivariate Normal Ellipse P=0.950

| Variable | Mean     | Std Dev  | Correlation | Signif. Prob | Number |
|----------|----------|----------|-------------|--------------|--------|
| Age      | 56.27143 | 19.4358  | 0.250948    | 0.1977       | 28     |
| CD14     | 5.7475   | 2.855775 |             |              |        |

Bivariate Fit of CD19 By Age

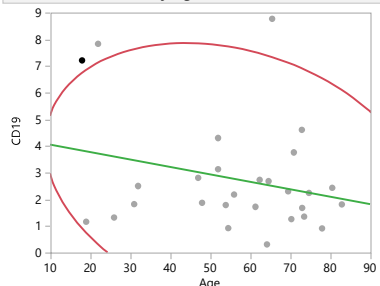

— Bivariate Normal Ellipse P=0.950  
— Linear Fit

Bivariate Normal Ellipse P=0.950

| Variable | Mean     | Std Dev  | Correlation | Signif. Prob | Number |
|----------|----------|----------|-------------|--------------|--------|
| Age      | 56.27143 | 19.4358  | -0.25953    | 0.1823       | 28     |
| CD19     | 2.744286 | 2.081774 |             |              |        |

Bivariate Fit of CD235a By Age

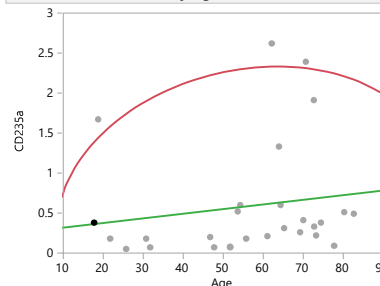

— Bivariate Normal Ellipse P=0.950  
— Linear Fit

Bivariate Normal Ellipse P=0.950

| Variable | Mean     | Std Dev | Correlation | Signif. Prob | Number |
|----------|----------|---------|-------------|--------------|--------|
| Age      | 56.27143 | 19.4358 | 0.157388    | 0.4238       | 28     |
| CD235a   | 0.5725   | 0.71397 |             |              |        |

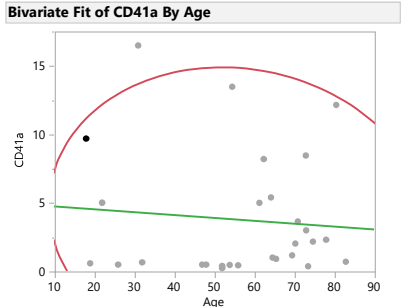

— Bivariate Normal Ellipse P=0.950  
— Linear Fit

**Bivariate Normal Ellipse P=0.950**

| Variable | Mean     | Std Dev  | Correlation | Signif. Prob | Number |
|----------|----------|----------|-------------|--------------|--------|
| Age      | 56.27143 | 19.4358  | -0.09046    | 0.6471       | 28     |
| CD41a    | 3.745714 | 4.540634 |             |              |        |

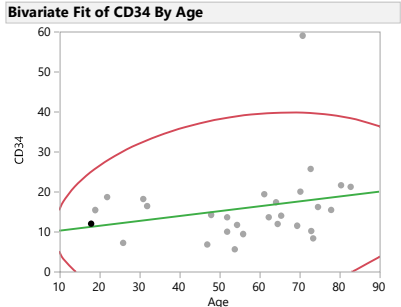

— Bivariate Normal Ellipse P=0.950  
— Linear Fit

**Bivariate Normal Ellipse P=0.950**

| Variable | Mean     | Std Dev  | Correlation | Signif. Prob | Number |
|----------|----------|----------|-------------|--------------|--------|
| Age      | 56.27143 | 19.4358  | 0.24205     | 0.2146       | 28     |
| CD34     | 15.74357 | 9.771028 |             |              |        |

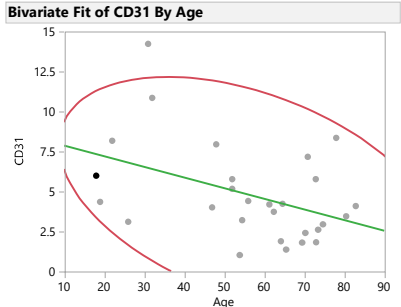

— Bivariate Normal Ellipse P=0.950  
— Linear Fit

**Bivariate Normal Ellipse P=0.950**

| Variable | Mean     | Std Dev  | Correlation | Signif. Prob | Number |
|----------|----------|----------|-------------|--------------|--------|
| Age      | 56.27143 | 19.4358  | -0.42858    | 0.0229*      | 28     |
| CD31     | 4.764643 | 3.013029 |             |              |        |

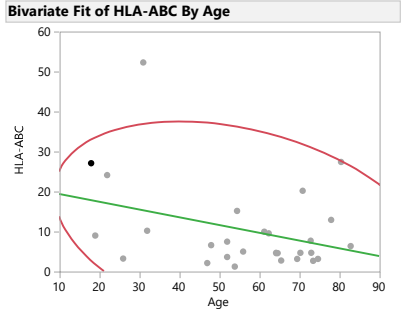

— Bivariate Normal Ellipse P=0.950  
— Linear Fit

**Bivariate Normal Ellipse P=0.950**

| Variable | Mean     | Std Dev  | Correlation | Signif. Prob | Number |
|----------|----------|----------|-------------|--------------|--------|
| Age      | 56.27143 | 19.4358  | -0.34103    | 0.0757       | 28     |
| HLA-ABC  | 10.31214 | 11.07914 |             |              |        |

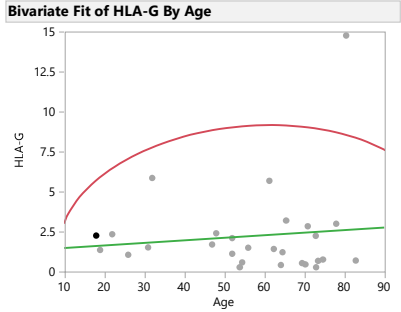

— Bivariate Normal Ellipse P=0.950  
— Linear Fit

**Bivariate Normal Ellipse P=0.950**

| Variable | Mean     | Std Dev  | Correlation | Signif. Prob | Number |
|----------|----------|----------|-------------|--------------|--------|
| Age      | 56.27143 | 19.4358  | 0.109654    | 0.5786       | 28     |
| HLA-G    | 2.188571 | 2.835742 |             |              |        |

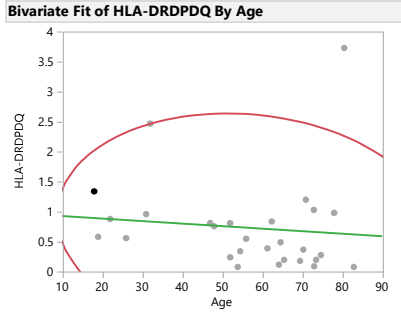

— Bivariate Normal Ellipse P=0.950  
— Linear Fit

**Bivariate Normal Ellipse P=0.950**

| Variable   | Mean     | Std Dev  | Correlation | Signif. Prob | Number |
|------------|----------|----------|-------------|--------------|--------|
| Age        | 56.27143 | 19.4358  | -0.10604    | 0.5912       | 28     |
| HLA-DRDPDQ | 0.724286 | 0.778081 |             |              |        |
