# Supplementary material for: Immune cell extracellular vesicles and their mitochondrial content decline with ageing
Source: Springer Nature journal article supplement (doi:10.1186/s12979-019-0172-9), 2020-01-04
Supplement: MOESM7 [file 17680408]

**Additional file 7: Table S2.** Spearman correlations between age and the expression levels (percentage, %; number, #; MFI) of MitoTracker Deep Red FM in gated plasma EV subpopulations. Spearman correlation was used to assess correlations between age and the expression levels (percentage, %; number, #; MFI) of MitoTracker Deep Red FM in gated plasma EV subpopulations from HCs (n=28). The correlations with Correlation Coefficient r value > 0.5 or < -0.5, and p < 0.05 were considered statistically significant.

|                  | % of MitoTracker Deep Red FM positive EVs in gated surface marker expressing populations |               |               |        |        |               |        |        |        |        |               |        |               |        |               |         |               |               |
|------------------|------------------------------------------------------------------------------------------|---------------|---------------|--------|--------|---------------|--------|--------|--------|--------|---------------|--------|---------------|--------|---------------|---------|---------------|---------------|
|                  | CD81                                                                                     | CD9           | CD29          | CD63   | CD8    | CD4           | CD56   | CD15   | CD68   | CD14   | CD19          | CD235a | CD41a         | CD34   | CD31          | HLA-ABC | HLA-G         | HLA-DRDPDQ    |
| P value          | 0.0375                                                                                   | <b>0.0116</b> | <b>0.0005</b> | 0.3933 | 0.1842 | 0.2179        | 0.2334 | 0.4908 | 0.3268 | 0.2659 | 0.1497        | 0.3501 | 0.9658        | 0.5867 | <b>0.0033</b> | 0.9449  | 0.0224        | 0.2184        |
| Spearman r value | -0.4                                                                                     | <b>-0.5</b>   | <b>-0.6</b>   | 0.2    | -0.3   | -0.2          | -0.2   | 0.1    | -0.2   | 0.2    | -0.3          | 0.2    | 0.0           | 0.1    | <b>-0.5</b>   | 0.0     | -0.4          | -0.2          |
|                  | # of MitoTracker Deep Red FM positive EVs in gated surface marker expressing populations |               |               |        |        |               |        |        |        |        |               |        |               |        |               |         |               |               |
|                  | CD81                                                                                     | CD9           | CD29          | CD63   | CD8    | CD4           | CD56   | CD15   | CD68   | CD14   | CD19          | CD235a | CD41a         | CD34   | CD31          | HLA-ABC | HLA-G         | HLA-DRDPDQ    |
| P value          | 0.0703                                                                                   | 0.0173        | <b>0.0012</b> | 0.0927 | 0.1881 | 0.8736        | 0.3956 | 0.6346 | 0.2362 | 0.9493 | 0.0253        | 0.2591 | 0.6217        | 0.5341 | <b>0.0149</b> | 0.4067  | 0.1159        | 0.1738        |
| Spearman r value | -0.3                                                                                     | -0.4          | <b>-0.6</b>   | -0.3   | -0.3   | 0.0           | -0.2   | 0.1    | -0.2   | 0.0    | -0.4          | -0.2   | 0.1           | 0.1    | <b>-0.5</b>   | -0.2    | -0.3          | -0.3          |
|                  | MIF of MitoTracker Deep Red FM in gated surface marker expressing populations            |               |               |        |        |               |        |        |        |        |               |        |               |        |               |         |               |               |
|                  | CD81                                                                                     | CD9           | CD29          | CD63   | CD8    | CD4           | CD56   | CD15   | CD68   | CD14   | CD19          | CD235a | CD41a         | CD34   | CD31          | HLA-ABC | HLA-G         | HLA-DRDPDQ    |
| P value          | <b>0.0056</b>                                                                            | <b>0.0099</b> | <b>0.0002</b> | 0.0953 | 0.0164 | <b>0.0001</b> | 0.0263 | 0.0586 | 0.0178 | 0.8813 | <b>0.0037</b> | 0.8130 | <b>0.0115</b> | 0.5470 | <b>0.0020</b> | 0.0875  | <b>0.0003</b> | <b>0.0017</b> |
| Spearman r value | <b>-0.5</b>                                                                              | <b>-0.5</b>   | <b>-0.7</b>   | -0.3   | -0.4   | <b>-0.7</b>   | -0.4   | 0.4    | -0.4   | 0.0    | <b>-0.5</b>   | 0.0    | <b>-0.5</b>   | 0.1    | <b>-0.6</b>   | -0.3    | <b>-0.6</b>   | <b>-0.6</b>   |
